# Supplementary material
Source: ML conference proceedings conference paper supplement (https://proceedings.neurips.cc/paper_files/paper/2015/hash/95151403b0db4f75bfd8da0b393af853-Abstract.html)
Supplement: Supplementary file [file 95151403b0db4f75bfd8da0b393af853-Supplemental.zip]

---

# Deep Temporal Sigmoid Belief Networks for Sequence Modeling: Supplementary Material

---

**Zhe Gan, Chunyuan Li, Ricardo Henao, David Carlson and Lawrence Carin**

Department of Electrical and Computer Engineering

Duke University, Durham, NC 27708

{zhe.gan, chunyuan.li, r.henao, david.carlson, lcarin}@duke.edu

## A Outline of the NVIL algorithm

The outline of the NVIL algorithm for computing gradients are shown below (reproduced from [1]).  $C_\lambda(\mathbf{v}_t)$  represents the data-dependent baseline, and  $\alpha = 0.8$  throughout the experiments.

---

**Algorithm 1** Compute gradient estimates for the model parameters and recognition parameters.

---

```

 $\Delta\theta \leftarrow 0, \Delta\phi \leftarrow 0, \Delta\lambda \leftarrow 0$ 
 $\mathcal{L} \leftarrow 0$ 
for  $t \leftarrow 1$  to  $T$  do
   $\mathbf{h}_t \sim q_\phi(\mathbf{h}_t|\mathbf{v}_t)$ 
   $l_t \leftarrow \log p_\theta(\mathbf{v}_t, \mathbf{h}_t) - \log q_\phi(\mathbf{h}_t|\mathbf{v}_t)$ 
   $\mathcal{L} \leftarrow \mathcal{L} + l_t$ 
   $l_t \leftarrow l_t - C_\lambda(\mathbf{v}_t)$ 
end for
 $c_b \leftarrow \text{mean}(l_1, \dots, l_T)$ 
 $v_b \leftarrow \text{variance}(l_1, \dots, l_T)$ 
 $c \leftarrow \alpha c + (1 - \alpha)c_b$ 
 $v \leftarrow \alpha v + (1 - \alpha)v_b$ 
for  $t \leftarrow 1$  to  $T$  do
   $l_t \leftarrow \frac{l_t - c}{\max(1, \sqrt{v})}$ 
   $\Delta\theta \leftarrow \Delta\theta + \nabla_\theta \log p_\theta(\mathbf{v}_t, \mathbf{h}_t)$ 
   $\Delta\phi \leftarrow \Delta\phi + l_t \nabla_\phi \log q_\phi(\mathbf{h}_t|\mathbf{v}_t)$ 
   $\Delta\lambda \leftarrow \Delta\lambda + l_t \nabla_\lambda C_\lambda(\mathbf{v}_t)$ 
end for

```

---

## B Learning and Inference Details on TSBN

For  $t = 1, \dots, T$ , consider  $\mathbf{v}_t \in \{0, 1\}^M$ ,  $\mathbf{h}_t \in \{0, 1\}^J$ , the model parameters  $\theta$  are specified as  $\mathbf{W}_1 \in \mathbb{R}^{J \times J}$ ,  $\mathbf{W}_2 \in \mathbb{R}^{M \times J}$ ,  $\mathbf{W}_3 \in \mathbb{R}^{J \times M}$ ,  $\mathbf{W}_4 \in \mathbb{R}^{M \times M}$ ,  $\mathbf{b} \in \mathbb{R}^J$ , and  $\mathbf{c} \in \mathbb{R}^M$ . The generative model is expressed as

$$p(h_{jt} = 1 | \mathbf{h}_{t-1}, \mathbf{v}_{t-1}) = \sigma(\mathbf{w}_{1j}^\top \mathbf{h}_{t-1} + \mathbf{w}_{3j}^\top \mathbf{v}_{t-1} + b_j), \quad (1)$$

$$p(v_{mt} = 1 | \mathbf{h}_t, \mathbf{v}_{t-1}) = \sigma(\mathbf{w}_{2m}^\top \mathbf{h}_t + \mathbf{w}_{4m}^\top \mathbf{v}_{t-1} + c_m), \quad (2)$$

The recognition model is expressed as

$$q(h_{jt} = 1 | \mathbf{h}_{t-1}, \mathbf{v}_t, \mathbf{v}_{t-1}) = \sigma(\mathbf{u}_{1j}^\top \mathbf{h}_{t-1} + \mathbf{u}_{2j}^\top \mathbf{v}_t + \mathbf{u}_{3j}^\top \mathbf{v}_{t-1} + d_j), \quad (3)$$

where the recognition parameters are specified as  $\mathbf{U}_1 \in \mathbb{R}^{J \times J}$ ,  $\mathbf{U}_2 \in \mathbb{R}^{J \times M}$ ,  $\mathbf{U}_3 \in \mathbb{R}^{J \times M}$ , and  $\mathbf{d} \in \mathbb{R}^J$ .  $\mathbf{h}_0$  and  $\mathbf{v}_0$ , needed for  $p(\mathbf{h}_1)$ ,  $p(\mathbf{v}_1 | \mathbf{h}_1)$  and  $q(\mathbf{h}_1 | \mathbf{v}_1)$ , are defined as zero vectors, for conciseness.

In order to implement the NVIL algorithm described in [1], we need to calculate the lower bound and also the gradients. Specifically, we have the variational lower bound  $\mathcal{L} = \sum_{t=1}^T \mathbb{E}_{q_\phi(\mathbf{h}|\mathbf{v})}[l_t]$ , where  $l_t$  is expressed as

$$l_t = \sum_{j=1}^J \left( \psi_{jt}^{(1)} h_{jt} - \log(1 + \exp(\psi_{jt}^{(1)})) \right) + \sum_{m=1}^M \left( \psi_{mt}^{(2)} v_{mt} - \log(1 + \exp(\psi_{mt}^{(2)})) \right) - \left[ \sum_{j=1}^J \left( \psi_{jt}^{(3)} h_{jt} - \log(1 + \exp(\psi_{jt}^{(3)})) \right) \right], \quad (4)$$

and we have defined

$$\psi_{jt}^{(1)} = \mathbf{w}_{1j}^\top \mathbf{h}_{t-1} + \mathbf{w}_{3j}^\top \mathbf{v}_{t-1} + b_j, \quad (5)$$

$$\psi_{mt}^{(2)} = \mathbf{w}_{2m}^\top \mathbf{h}_t + \mathbf{w}_{4m}^\top \mathbf{v}_{t-1} + c_m, \quad (6)$$

$$\psi_{jt}^{(3)} = \mathbf{u}_{1j}^\top \mathbf{h}_{t-1} + \mathbf{u}_{2j}^\top \mathbf{v}_t + \mathbf{u}_{3j}^\top \mathbf{v}_{t-1} + d_j. \quad (7)$$

By further defining

$$\chi_{jt}^{(1)} = h_{jt} - \sigma(\psi_{jt}^{(1)}), \quad \chi_{mt}^{(2)} = v_{mt} - \sigma(\psi_{mt}^{(2)}), \quad \chi_{jt}^{(3)} = h_{jt} - \sigma(\psi_{jt}^{(3)}), \quad (8)$$

The gradients for the model parameters  $\theta$  are expressed as

$$\begin{aligned} \frac{\partial \log p_\theta(\mathbf{v}_t, \mathbf{h}_t)}{\partial w_{1jj'}} &= \chi_{jt}^{(1)} h_{j't-1}, & \frac{\partial \log p_\theta(\mathbf{v}_t, \mathbf{h}_t)}{\partial w_{3jm}} &= \chi_{jt}^{(1)} v_{mt-1}, & \frac{\partial \log p_\theta(\mathbf{v}_t, \mathbf{h}_t)}{\partial b_j} &= \chi_{jt}^{(1)}, & (9) \\ \frac{\partial \log p_\theta(\mathbf{v}_t, \mathbf{h}_t)}{\partial w_{2mj}} &= \chi_{mt}^{(2)} h_{jt}, & \frac{\partial \log p_\theta(\mathbf{v}_t, \mathbf{h}_t)}{\partial w_{4mm'}} &= \chi_{mt}^{(2)} v_{m't-1}, & \frac{\partial \log p_\theta(\mathbf{v}_t, \mathbf{h}_t)}{\partial c_m} &= \chi_{mt}^{(2)}. & (10) \end{aligned}$$

The gradients for the recognition parameters  $\phi$  are expressed as

$$\frac{\partial \log q_\phi(\mathbf{h}_t|\mathbf{v}_t)}{\partial u_{1jj'}} = \chi_{jt}^{(3)} h_{j't-1}, \quad \frac{\partial \log q_\phi(\mathbf{h}_t|\mathbf{v}_t)}{\partial u_{2jm}} = \chi_{jt}^{(3)} v_{mt}, \quad (11)$$

$$\frac{\partial \log q_\phi(\mathbf{h}_t|\mathbf{v}_t)}{\partial u_{3jm}} = \chi_{jt}^{(3)} v_{mt-1}, \quad \frac{\partial \log q_\phi(\mathbf{h}_t|\mathbf{v}_t)}{\partial d_j} = \chi_{jt}^{(3)}. \quad (12)$$

## B.1 Modeling Real-valued Data

When modeling real-valued data, we substitute (2) with  $p(\mathbf{v}_t|\mathbf{h}_t, \mathbf{v}_{t-1}) = \mathcal{N}(\boldsymbol{\mu}_t, \text{diag}(\boldsymbol{\sigma}_t^2))$ , where

$$\boldsymbol{\mu}_{mt} = \mathbf{w}_{2m}^\top \mathbf{h}_t + \mathbf{w}_{4m}^\top \mathbf{v}_{t-1} + c_m, \quad \log \sigma_{mt} = (\mathbf{w}'_{2m})^\top \mathbf{h}_t + (\mathbf{w}'_{4m})^\top \mathbf{v}_{t-1} + c'_m, \quad (13)$$

and we have  $\mathbf{W}'_2 \in \mathbb{R}^{M \times J}$  and  $\mathbf{W}'_4 \in \mathbb{R}^{M \times M}$ . The recognition model remains the same as in (3). Let  $\tau_{mt} = \log \sigma_{mt}$ , we obtain

$$l_t = \sum_{j=1}^J \left( \psi_{jt}^{(1)} h_{jt} - \log(1 + \exp(\psi_{jt}^{(1)})) \right) - \sum_{m=1}^M \left( \frac{1}{2} \log 2\pi + \tau_{mt} + \frac{(v_{mt} - \mu_{mt})^2}{2e^{2\tau_{mt}}} \right) - \left[ \sum_{j=1}^J \left( \psi_{jt}^{(3)} h_{jt} - \log(1 + \exp(\psi_{jt}^{(3)})) \right) \right]. \quad (14)$$

All the gradient calculation remains the same as (9)-(12), except the following.

$$\frac{\partial \log p_\theta(\mathbf{v}_t, \mathbf{h}_t)}{\partial w_{2mj}} = \chi_{mt}^{(4)} h_{jt}, \quad \frac{\partial \log p_\theta(\mathbf{v}_t, \mathbf{h}_t)}{\partial w_{4mm'}} = \chi_{mt}^{(4)} v_{m't-1}, \quad \frac{\partial \log p_\theta(\mathbf{v}_t, \mathbf{h}_t)}{\partial c_m} = \chi_{mt}^{(4)}, \quad (15)$$

$$\frac{\partial \log p_\theta(\mathbf{v}_t, \mathbf{h}_t)}{\partial w'_{2mj}} = \chi_{mt}^{(5)} h_{jt}, \quad \frac{\partial \log p_\theta(\mathbf{v}_t, \mathbf{h}_t)}{\partial w'_{4mm'}} = \chi_{mt}^{(5)} v_{m't-1}, \quad \frac{\partial \log p_\theta(\mathbf{v}_t, \mathbf{h}_t)}{\partial c'_m} = \chi_{mt}^{(5)}, \quad (16)$$

where we have defined

$$\chi_{mt}^{(4)} = \frac{\partial \log p_\theta(\mathbf{v}_t, \mathbf{h}_t)}{\partial \mu_{mt}} = \frac{v_{mt} - \mu_{mt}}{e^{2\tau_{mt}}}, \quad \chi_{mt}^{(5)} = \frac{\partial \log p_\theta(\mathbf{v}_t, \mathbf{h}_t)}{\partial \tau_{mt}} = \frac{(v_{mt} - \mu_{mt})^2}{e^{2\tau_{mt}}} - 1. \quad (17)$$

## B.2 Modeling Count Data

We also introduce an approach for modeling time-series data with count observations, by replacing (2) with  $p(\mathbf{v}_t | \mathbf{h}_t, \mathbf{v}_{t-1}) = \prod_{m=1}^M y_{mt}^{v_{mt}}$ , where

$$y_{mt} = \frac{\exp(\mathbf{w}_{2m}^\top \mathbf{h}_t + \mathbf{w}_{4m}^\top \mathbf{v}_{t-1} + c_m)}{\sum_{m'=1}^M \exp(\mathbf{w}_{2m'}^\top \mathbf{h}_t + \mathbf{w}_{4m'}^\top \mathbf{v}_{t-1} + c_{m'})}. \quad (18)$$

The recognition model still remains the same as in (3). The  $l_t$  now is expressed as

$$l_t = \sum_{j=1}^J \left( \psi_{jt}^{(1)} h_{jt} - \log(1 + \exp(\psi_{jt}^{(1)})) \right) + \sum_{m=1}^M \left( \psi_{mt}^{(2)} v_{mt} - v_{mt} \log \sum_{m'=1}^M \exp(\psi_{m't}^{(2)}) \right) - \left[ \sum_{j=1}^J \left( \psi_{jt}^{(3)} h_{jt} - \log(1 + \exp(\psi_{jt}^{(3)})) \right) \right]. \quad (19)$$

All the gradient calculations remain the same as (9)-(12), except the following

$$\frac{\partial \log p_{\theta}(\mathbf{v}_t, \mathbf{h}_t)}{\partial w_{2mj}} = \chi_{mt}^{(6)} h_{jt}, \quad \frac{\partial \log p_{\theta}(\mathbf{v}_t, \mathbf{h}_t)}{\partial w_{4mm'}} = \chi_{mt}^{(6)} v_{m't-1}, \quad \frac{\partial \log p_{\theta}(\mathbf{v}_t, \mathbf{h}_t)}{\partial c_m} = \chi_{mt}^{(6)}. \quad (20)$$

where we have defined  $\chi_{mt}^{(6)} = v_{mt} - y_{mt} \sum_{m'=1}^M v_{m't}$ .

## C Learning and Inference Details on Deep TSBN

For the ease of notation, we consider a two-hidden-layer deep TSBN here, which can be readily extended to a deep model with any depth. For  $t = 1, \dots, T$ , we consider the observation as  $\mathbf{v}_t \in \{0, 1\}^M$ . The top hidden layer is denoted as  $\mathbf{z}_t \in \{0, 1\}^J$ .

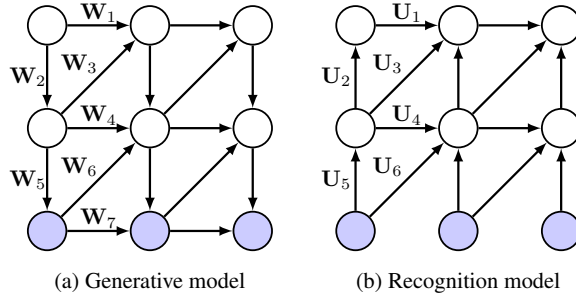

Figure 1: Generative and recognition model of a two-layer Deep TSBN.

### C.1 Using stochastic hidden layer

Denote the first stochastic hidden layer as  $\mathbf{h}_t \in \{0, 1\}^K$ . The generative model is expressed as

$$p(z_{jt} = 1) = \sigma(\mathbf{w}_{1j}^\top \mathbf{z}_{t-1} + \mathbf{w}_{3j}^\top \mathbf{h}_{t-1} + b_{1j}), \quad (21)$$

$$p(h_{kt} = 1) = \sigma(\mathbf{w}_{2k}^\top \mathbf{z}_t + \mathbf{w}_{4k}^\top \mathbf{h}_{t-1} + \mathbf{w}_{6k}^\top \mathbf{v}_{t-1} + b_{2k}), \quad (22)$$

$$p(v_{mt} = 1) = \sigma(\mathbf{w}_{5m}^\top \mathbf{h}_t + \mathbf{w}_{7m}^\top \mathbf{v}_{t-1} + b_{3m}), \quad (23)$$

where we have defined  $\mathbf{W}_1 \in \mathbb{R}^{J \times J}$ ,  $\mathbf{W}_2 \in \mathbb{R}^{K \times J}$ ,  $\mathbf{W}_3 \in \mathbb{R}^{J \times K}$ ,  $\mathbf{W}_4 \in \mathbb{R}^{K \times K}$ ,  $\mathbf{W}_5 \in \mathbb{R}^{M \times K}$ ,  $\mathbf{W}_6 \in \mathbb{R}^{K \times M}$ , and  $\mathbf{W}_7 \in \mathbb{R}^{M \times M}$ . The bias terms are  $\mathbf{b}_1 \in \mathbb{R}^{J \times 1}$ ,  $\mathbf{b}_2 \in \mathbb{R}^{K \times 1}$  and  $\mathbf{b}_3 \in \mathbb{R}^{M \times 1}$ . The corresponding recognition model is expressed as

$$q(h_{kt} = 1) = \sigma(\mathbf{u}_{5k}^\top \mathbf{v}_t + \mathbf{u}_{4k}^\top \mathbf{h}_{t-1} + \mathbf{u}_{6k}^\top \mathbf{v}_{t-1} + c_{2k}) \quad (24)$$

$$q(z_{jt} = 1) = \sigma(\mathbf{u}_{2j}^\top \mathbf{h}_t + \mathbf{u}_{1j}^\top \mathbf{z}_{t-1} + \mathbf{u}_{3j}^\top \mathbf{h}_{t-1} + c_{1j}) \quad (25)$$

where the recognition parameters are specified as  $\mathbf{U}_1 \in \mathbb{R}^{J \times J}$ ,  $\mathbf{U}_2 \in \mathbb{R}^{J \times K}$ ,  $\mathbf{U}_3 \in \mathbb{R}^{J \times K}$ ,  $\mathbf{U}_4 \in \mathbb{R}^{K \times K}$ ,  $\mathbf{U}_5 \in \mathbb{R}^{K \times M}$  and  $\mathbf{U}_6 \in \mathbb{R}^{K \times M}$ . The bias terms are  $\mathbf{c}_1 \in \mathbb{R}^{J \times 1}$  and  $\mathbf{c}_2 \in \mathbb{R}^{K \times 1}$ . Now,  $l_t$  is expressed as

$$\begin{aligned}
l_t = & \sum_{j=1}^J \left( \psi_{jt}^{(1)} z_{jt} - \log(1 + \exp(\psi_{jt}^{(1)})) \right) + \sum_{k=1}^K \left( \psi_{kt}^{(2)} h_{kt} - \log(1 + \exp(\psi_{kt}^{(2)})) \right) \\
& + \sum_{m=1}^M \left( \psi_{mt}^{(3)} v_{mt} - \log(1 + \exp(\psi_{mt}^{(3)})) \right) \\
& - \left[ \sum_{k=1}^K \left( \psi_{kt}^{(4)} h_{kt} - \log(1 + \exp(\psi_{kt}^{(4)})) \right) + \sum_{j=1}^J \left( \psi_{jt}^{(5)} z_{jt} - \log(1 + \exp(\psi_{jt}^{(5)})) \right) \right], \tag{26}
\end{aligned}$$

and we have defined

$$\psi_{jt}^{(1)} = \mathbf{w}_{1j}^\top \mathbf{z}_{t-1} + \mathbf{w}_{3j}^\top \mathbf{h}_{t-1} + b_{1j}, \tag{27}$$

$$\psi_{kt}^{(2)} = \mathbf{w}_{2k}^\top \mathbf{z}_t + \mathbf{w}_{4k}^\top \mathbf{h}_{t-1} + \mathbf{w}_{6k}^\top \mathbf{v}_{t-1} + b_{2k}, \tag{28}$$

$$\psi_{mt}^{(3)} = \mathbf{w}_{5m}^\top \mathbf{h}_t + \mathbf{w}_{7m}^\top \mathbf{v}_{t-1} + b_{3m}, \tag{29}$$

$$\psi_{kt}^{(4)} = \mathbf{u}_{5k}^\top \mathbf{v}_t + \mathbf{u}_{4k}^\top \mathbf{h}_{t-1} + \mathbf{u}_{6k}^\top \mathbf{v}_{t-1} + c_{2k}, \tag{30}$$

$$\psi_{jt}^{(5)} = \mathbf{u}_{2j}^\top \mathbf{h}_t + \mathbf{u}_{1j}^\top \mathbf{z}_{t-1} + \mathbf{u}_{3j}^\top \mathbf{h}_{t-1} + c_{1j}. \tag{31}$$

All the gradients can be calculated readily as in (9)-(12).

## C.2 Using deterministic hidden layer

For the generative model, denote the deterministic hidden layer as  $\mathbf{h}_t^g \in \mathbb{R}^K$ . For the recognition model, denote the deterministic hidden layer as  $\mathbf{h}_t^r \in \mathbb{R}^K$ .  $\mathbf{W}_3$  and  $\mathbf{U}_3$  are set to be zero matrices for the ease of gradient calculation. The generative model is expressed as

$$p(z_{jt} = 1) = \sigma(\mathbf{w}_{1j}^\top \mathbf{z}_{t-1} + b_{1j}), \tag{32}$$

$$h_{kt}^g = f(\mathbf{w}_{2k}^\top \mathbf{z}_t + \mathbf{w}_{4k}^\top \mathbf{h}_{t-1}^g + \mathbf{w}_{6k}^\top \mathbf{v}_{t-1} + b_{2k}), \tag{33}$$

$$p(v_{mt} = 1) = \sigma(\mathbf{w}_{5m}^\top \mathbf{h}_t + \mathbf{w}_{7m}^\top \mathbf{v}_{t-1} + b_{3m}), \tag{34}$$

The corresponding recognition model is expressed as

$$h_{kt}^r = f(\mathbf{u}_{5k}^\top \mathbf{v}_t + \mathbf{u}_{4k}^\top \mathbf{h}_{t-1} + \mathbf{u}_{6k}^\top \mathbf{v}_{t-1} + c_{2k}) \tag{35}$$

$$q(z_{jt} = 1) = \sigma(\mathbf{u}_{2j}^\top \mathbf{h}_t + \mathbf{u}_{1j}^\top \mathbf{z}_{t-1} + c_{1j}) \tag{36}$$

Hence,  $\mathcal{L} = \sum_{t=1}^T \mathbb{E}_{q_\phi(\mathbf{h}|\mathbf{v})}[l_t]$ , and  $l_t$  is expressed as

$$\begin{aligned}
l_t = & \sum_{j=1}^J \left( \psi_{jt}^{(1)} z_{jt} - \log(1 + \exp(\psi_{jt}^{(1)})) \right) + \sum_{m=1}^M \left( \psi_{mt}^{(2)} v_{mt} - \log(1 + \exp(\psi_{mt}^{(2)})) \right) \\
& - \left[ \sum_{j=1}^J \left( \psi_{jt}^{(3)} z_{jt} - \log(1 + \exp(\psi_{jt}^{(3)})) \right) \right], \tag{37}
\end{aligned}$$

and we have defined

$$\psi_{jt}^{(1)} = \mathbf{w}_{1j}^\top \mathbf{z}_{t-1} + b_{1j}, \tag{38}$$

$$\psi_{mt}^{(2)} = \mathbf{w}_{5m}^\top \mathbf{h}_t^g + \mathbf{w}_{7m}^\top \mathbf{v}_{t-1} + b_{3m}, \tag{39}$$

$$\psi_{jt}^{(3)} = \mathbf{u}_{2j}^\top \mathbf{h}_t^r + \mathbf{u}_{1j}^\top \mathbf{z}_{t-1} + c_{1j}. \tag{40}$$

The gradients *w.r.t.*  $\mathbf{W}_1, \mathbf{W}_5, \mathbf{W}_7, \mathbf{U}_1$  and  $\mathbf{U}_2$  can be calculated easily. In order to calculate the gradients *w.r.t.*  $\mathbf{W}_2, \mathbf{W}_4, \mathbf{W}_6, \mathbf{U}_4, \mathbf{U}_5$  and  $\mathbf{U}_6$ , we need to obtain  $\frac{\partial \mathcal{L}}{\partial h_{kt}^g}$  and  $\frac{\partial \mathcal{L}}{\partial h_{kt}^r}$ , which can be

Table 1: Average prediction error and the average negative log-likelihood per frame for the bouncing balls dataset. ( $\diamond$ ) taken from [2].

| MODEL             | DIM     | ORDER | PRED. ERR.             | NEG. LOG. LIKE.         |
|-------------------|---------|-------|------------------------|-------------------------|
| DTSBN-S           | 100-100 | 2     | <b>2.79</b> $\pm$ 0.39 | <b>69.29</b> $\pm$ 1.52 |
| DTSBN-D           | 100-100 | 2     | 2.99 $\pm$ 0.42        | 70.47 $\pm$ 1.52        |
| DTSBN-S           | 100-100 | 1     | 10.39 $\pm$ 0.38       | 78.63 $\pm$ 0.92        |
| TSBN              | 100     | 4     | 3.07 $\pm$ 0.40        | 70.41 $\pm$ 1.55        |
| TSBN              | 100     | 2     | 4.00 $\pm$ 0.45        | 73.32 $\pm$ 1.75        |
| TSBN              | 100     | 1     | 9.48 $\pm$ 0.38        | 77.71 $\pm$ 0.83        |
| HMSBN             | 100     | 1     | 23.94 $\pm$ 0.41       | 86.27 $\pm$ 0.80        |
| AR                | 0       | 2     | 3.63 $\pm$ 0.42        | 73.80 $\pm$ 1.46        |
| AR                | 0       | 1     | 11.01 $\pm$ 0.24       | 93.61 $\pm$ 0.67        |
| RTRBM $\diamond$  | 3750    | 1     | 3.88 $\pm$ 0.33        | –                       |
| SRTRBM $\diamond$ | 3750    | 1     | 3.31 $\pm$ 0.33        | –                       |

calculated recursively via the back-propagation through time algorithm. Specifically,  $\frac{\partial \mathcal{L}}{\partial h_{kt}^g} = \frac{\partial \mathcal{Q}_1}{\partial h_{kt}^g}$  and we have defined

$$\mathcal{Q}_1 = \sum_{t=1}^T \sum_{m=1}^M \left( \psi_{mt}^{(2)} v_{mt} - \log(1 + \exp(\psi_{mt}^{(2)})) \right). \quad (41)$$

We observe that  $\mathcal{Q}_1$  can be computed recursively using

$$\mathcal{Q}_t = \sum_{\tau=t}^T \sum_{m=1}^M \left( \psi_{m\tau}^{(2)} v_{m\tau} - \log(1 + \exp(\psi_{m\tau}^{(2)})) \right) \quad (42)$$

$$= \mathcal{Q}_{t+1} + \sum_{m=1}^M \left( \psi_{mt}^{(2)} v_{mt} - \log(1 + \exp(\psi_{mt}^{(2)})) \right), \quad (43)$$

where  $\mathcal{Q}_{T+1} = 0$ . Using the chain rule, we have

$$\frac{\partial \mathcal{Q}_t}{\partial h_{kt}^g} = \sum_{k'} \frac{\partial \mathcal{Q}_{t+1}}{\partial h_{k't+1}^g} \cdot \frac{\partial h_{k't+1}^g}{\partial h_{kt}^g} + \sum_{m=1}^M w_{5mk} (v_{mt} - \sigma(\psi_{mt}^{(2)})) \quad (44)$$

$$= \sum_{k'} \frac{\partial \mathcal{Q}_{t+1}}{\partial h_{k't+1}^g} \cdot f'(\psi_{k't+1}^{(4)}) w_{4k'k} + \sum_{m=1}^M w_{5mk} (v_{mt} - \sigma(\psi_{mt}^{(2)})), \quad (45)$$

where we have defined

$$\psi_{kt}^{(4)} = \mathbf{w}_{2k}^\top \mathbf{z}_t + \mathbf{w}_{4k}^\top \mathbf{h}_{t-1}^g + \mathbf{w}_{6k}^\top \mathbf{v}_{t-1}^g + b_{2k}, \quad (46)$$

and

$$\frac{\partial \mathcal{Q}_T}{\partial h_{kt}^g} = \sum_{m=1}^M w_{5mk} (v_{mT} - \sigma(\psi_{mT}^{(2)})). \quad (47)$$

$\frac{\partial \mathcal{L}}{\partial h_{kt}^g}$  can be calculated similarly.

## D Additional Results

### D.1 Generated Data

The generated, synthetic motion capture data, and polyphonic music data can be downloaded from [https://drive.google.com/drive/u/0/folders/0B1HR6m3IZSO\\_SWt0aS1oYmlneDQ](https://drive.google.com/drive/u/0/folders/0B1HR6m3IZSO_SWt0aS1oYmlneDQ).

### D.2 Bouncing balls dataset

Additional experimental results are shown in Table 1. AR represents an auto-regressive Markov model without latent variables [3].

Table 2: Average prediction error obtained for the MIT motion capture dataset.

| MODEL   | PRED. ERR.       |
|---------|------------------|
| DTsBN-S | $3.71 \pm 0.03$  |
| DTsBN-D | $4.19 \pm 0.01$  |
| TSBN    | $3.86 \pm 0.02$  |
| HMSBN   | $17.49 \pm 0.20$ |

### D.3 MIT motion capture dataset

We randomly select 10% of the dataset as the test set. Quantitative results are shown in Table 2.

### References

- [1] A. Mnih and K. Gregor. Neural variational inference and learning in belief networks. In *ICML*, 2014.
- [2] R. Mittelman, B. Kuipers, S. Savarese, and H. Lee. Structured recurrent temporal restricted boltzmann machines. In *ICML*, 2014.
- [3] Christopher M Bishop. *Pattern recognition and machine learning*. springer, 2006.
